# Supplementary material
Source: PubMed Central journal article supplement (PMC4524761)
Supplement: supp_the2015-0020_Supplemental_Figures.pdf [file supp_the2015-0020_Supplemental_Figures.pdf]

Supplemental Figures for:  
Patterns of care and clinical outcomes of first-line trastuzumab-based therapy in HER2-positive metastatic breast cancer patients relapsing after (neo)adjuvant trastuzumab: an Italian multicenter retrospective cohort study  
Matteo Lambertini et al.

**Figure S1.** The study flow diagram of participants.

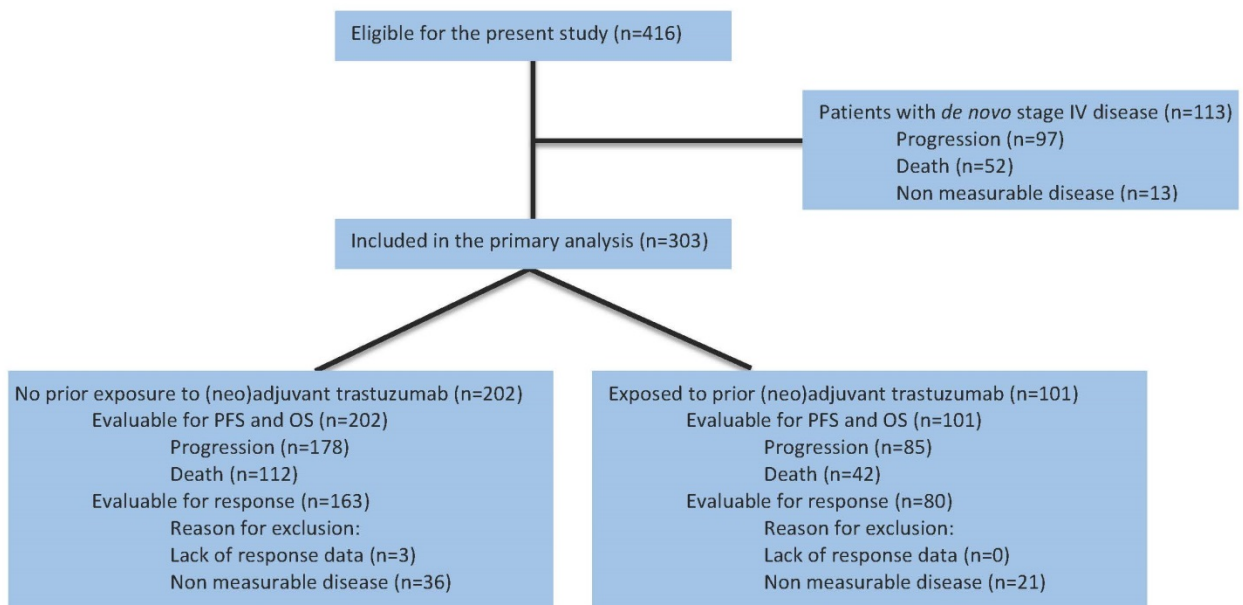

Abbreviations: PFS, progression-free survival; OS, overall survival.

Supplemental Figures for:  
Patterns of care and clinical outcomes of first-line trastuzumab-based therapy in HER2-positive metastatic breast cancer patients relapsing after (neo)adjuvant trastuzumab: an Italian multicenter retrospective cohort study  
Matteo Lambertini et al.

**Figure S2.** Overall survival by type of relapse (visceral involvement vs non-visceral involvement) and prior trastuzumab exposure in patients with HER2 positive metastatic breast cancer undergoing first-line trastuzumab-based therapy.

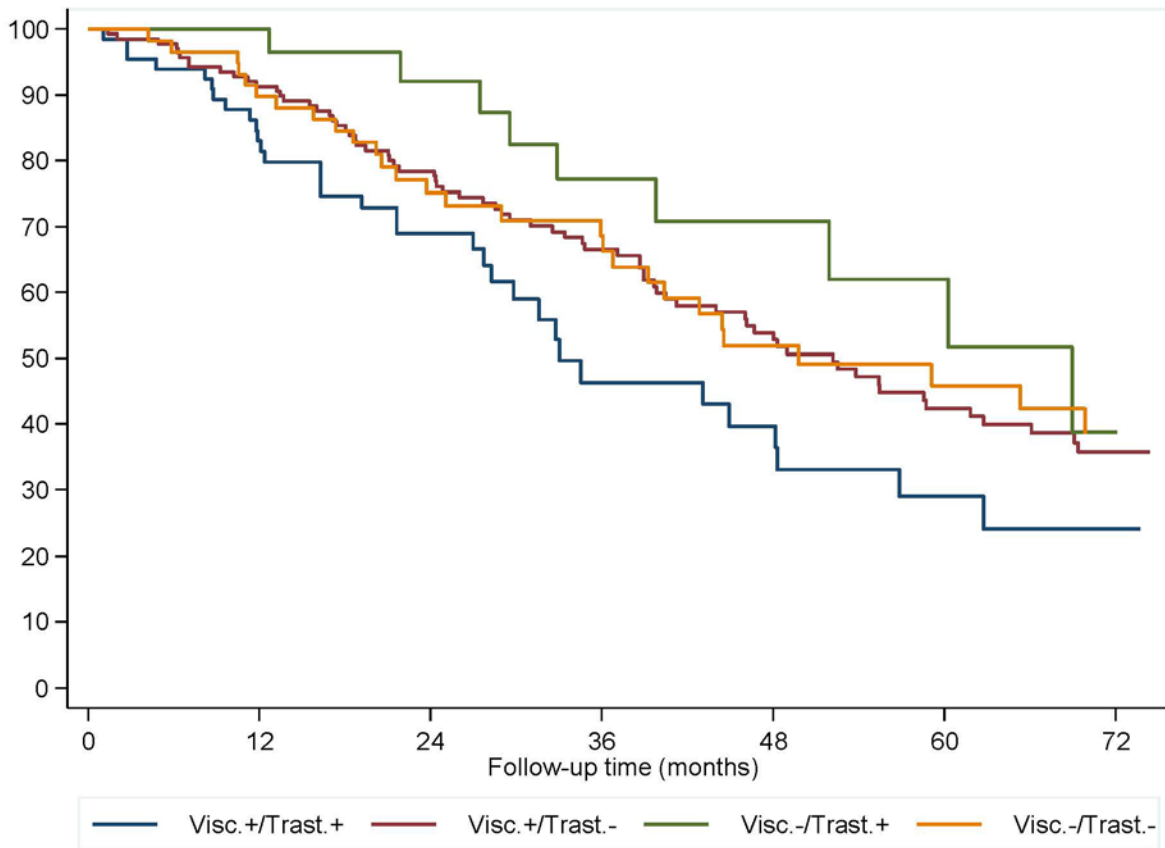

Abbreviations: Visc.+/Trast.+, patients with visceral relapse and prior trastuzumab exposure; Visc.+/Trast.-, patients with visceral relapse and without prior trastuzumab exposure; Visc.-/Trast.+, patients with non-visceral relapse and prior trastuzumab exposure; Visc.-/Trast.-, patients with non-visceral relapse and without prior trastuzumab exposure.

Supplemental Figures for:

Patterns of care and clinical outcomes of first-line trastuzumab-based therapy in HER2-positive metastatic breast cancer patients relapsing after (neo)adjuvant trastuzumab: an Italian multicenter retrospective cohort study

Matteo Lambertini et al.
