# Supplementary material
Source: PubMed Central journal article supplement (PMC4524761)
Supplement: supp_the2015-0020_Supplemental_Tables.pdf [file supp_the2015-0020_Supplemental_Tables.pdf]

Supplemental Tables for:

Patterns of care and clinical outcomes of first-line trastuzumab-based therapy in HER2-positive metastatic breast cancer patients relapsing after (neo)adjuvant trastuzumab: an Italian multicenter retrospective cohort study

Matteo Lambertini et al.

**Table S1.** Baseline characteristics of patients with de novo stage IV disease.

| Characteristic                        | Patients with de novo stage IV disease<br>n=113 (%) |
|---------------------------------------|-----------------------------------------------------|
| Age (range), years                    | 53.57 (44.05 – 63.37)                               |
| Breast cancer diagnosis prior to 2007 | 55 (48.7)                                           |
| Menopausal status                     |                                                     |
| Premenopausal                         | 44 (38.9)                                           |
| Postmenopausal                        | 69 (61.1)                                           |
| Histologic type                       |                                                     |
| Ductal carcinoma                      | 96 (85.0)                                           |
| Lobular carcinoma                     | 2 (1.8)                                             |
| Others                                | 3 (2.7)                                             |
| Unknown                               | 12 (10.6)                                           |
| Hormone receptor status               |                                                     |
| Positive (ER and/or PR positive)      | 64 (56.6)                                           |
| Negative (ER and PR negative)         | 44 (38.9)                                           |
| Unknown                               | 5 (4.4)                                             |
| Grade (G)                             |                                                     |
| G1                                    | 0 (0.0)                                             |
| G2                                    | 16 (14.2)                                           |
| G3                                    | 27 (23.9)                                           |
| Unknown                               | 70 (61.9)                                           |

**Table S2.** First site of distant metastasis according to hormone receptor status irrespective of prior exposure to (neo)adjuvant trastuzumab.

|                                  | Hormone receptor<br>positive<br>n=186 (%) | Hormone receptor<br>negative<br>n=115 (%) | Hormone receptor<br>unknown<br>n=2 (%) | p value<br>(HR+ vs HR-) |
|----------------------------------|-------------------------------------------|-------------------------------------------|----------------------------------------|-------------------------|
| First site of distant metastasis |                                           |                                           |                                        | 0.186                   |
| Brain                            | 17 (9.1)                                  | 17 (14.8)                                 | 0 (0.0)                                | 0.133                   |
| Liver                            | 53 (28.5)                                 | 28 (24.3)                                 | 1 (50.0)                               | 0.431                   |
| Lung                             | 34 (18.3)                                 | 28 (24.3)                                 | 1 (50.0)                               | 0.206                   |
| Bone                             | 50 (26.9)                                 | 21 (18.3)                                 | 0 (0.0)                                | 0.087                   |
| Others                           | 32 (17.2)                                 | 21 (18.3)                                 | 0 (0.0)                                | 0.815                   |
| First site of distant metastasis |                                           |                                           |                                        | 0.156                   |
| Visceral involvement             | 123 (66.1)                                | 85 (73.9)                                 | 2 (100)                                |                         |
| Non-visceral involvement         | 63 (33.9)                                 | 30 (26.1)                                 | 0 (0.0)                                |                         |

Abbreviations: HR+, hormone receptor positive; HR-, hormone receptor negative.

**Table S3.** Characteristics of patients with de novo stage IV disease at the time of breast cancer diagnosis and features of the first-line treatment received.

| Characteristic                                              | Patients with de novo stage IV disease<br>n=113 (%) |
|-------------------------------------------------------------|-----------------------------------------------------|
| PFS follow-up (IQR range), years                            | 1.02 (0.46 – 1.82)                                  |
| OS follow-up (IQR range), years                             | 2.59 (1.61 – 4.44)                                  |
| First-site of distant relapse                               |                                                     |
| Brain                                                       | 5 (4.4)                                             |
| Liver                                                       | 58 (51.3)                                           |
| Lung                                                        | 20 (17.7)                                           |
| Bone                                                        | 23 (20.4)                                           |
| Others                                                      | 7 (6.2)                                             |
| Median number of metastatic sites (IQR range)               | 2 (1-3)                                             |
| Strategy as first-line therapy                              |                                                     |
| CT (± ET) + trastuzumab                                     | 108 (95.6)                                          |
| ET + trastuzumab                                            | 5 (4.4)                                             |
| Trastuzumab alone                                           | 0 (0.0)                                             |
| Type of first-line chemotherapy drugs                       |                                                     |
| Taxane-based                                                | 88 (81.5)                                           |
| Vinorelbine                                                 | 15 (13.9)                                           |
| Capecitabine                                                | 1 (0.9)                                             |
| Others                                                      | 4 (3.7)                                             |
| None                                                        | 5 (4.4)                                             |
| Type of first-line chemotherapy regimen                     |                                                     |
| Monotherapy                                                 | 70 (64.8)                                           |
| Combined therapy                                            | 38 (35.2)                                           |
| Type of first-line endocrine therapy                        |                                                     |
| Tamoxifen ± LHRHa                                           | 7 (20.6)                                            |
| AI ± LHRHa                                                  | 26 (76.5)                                           |
| Fulvestrant                                                 | 1 (2.9)                                             |
| None                                                        | 79 (69.9)                                           |
| Lines of therapy for metastatic disease, median (min – max) |                                                     |
| Chemotherapy                                                | 2 (0 – 8)                                           |
| Anti-HER2 therapy                                           | 2 (1 – 8)                                           |
| Endocrine therapy                                           | 0 (0 – 1)                                           |

Abbreviations: PFS, progression-free survival; IQR, interquartile range; OS, overall survival; CT, chemotherapy; ET, endocrine therapy; LHRHa, luteinizing hormone-releasing hormone analogues; AI, aromatase inhibitor.

**Table S4.** Objectives responses according to prior exposure to (neo)adjuvant trastuzumab.

|                               | <b>COHORT A</b><br><b>No prior (neo)adjuvant</b><br><b>trastuzumab</b><br><b>n=202 (%)</b> | <b>COHORT B</b><br><b>Prior (neo)adjuvant</b><br><b>trastuzumab</b><br><b>n=101 (%)</b> | <b>p value</b> |
|-------------------------------|--------------------------------------------------------------------------------------------|-----------------------------------------------------------------------------------------|----------------|
| Objective response rate (ORR) | 114 (69.9)                                                                                 | 49 (61.3)                                                                               | 0.176          |
| Adjusted OR (95% CI)          | 0.62 (0.34 – 1.15)                                                                         |                                                                                         | 0.131          |
| Best objective response       |                                                                                            |                                                                                         |                |
| Complete response             | 41 (25.2)                                                                                  | 20 (25.0)                                                                               | 0.979          |
| Partial response              | 73 (44.8)                                                                                  | 29 (36.3)                                                                               | 0.205          |
| Stable disease                | 29 (17.8)                                                                                  | 18 (22.5)                                                                               | 0.383          |
| Progressive disease           | 20 (12.3)                                                                                  | 13 (16.3)                                                                               | 0.395          |
| Clinical benefit rate (CBR)   | 129 (79.1)                                                                                 | 58 (72.5)                                                                               | 0.248          |
| Adjusted OR (95% CI)          | 0.73 (0.37 – 1.46)                                                                         |                                                                                         | 0.370          |
| Non evaluable for response    | 39 (19.3)                                                                                  | 21 (20.8)                                                                               | 0.606          |

Abbreviations: OR, odds ratio; CI, confidence intervals.

**Table S5.** Objectives responses according to prior exposure to (neo)adjuvant trastuzumab including patients with de novo stage IV disease.

|                            | <b>COHORT A</b><br><b>No prior (neo)adjuvant</b><br><b>trastuzumab</b><br><b>n=315 (%)</b> | <b>COHORT B</b><br><b>Prior (neo)adjuvant</b><br><b>trastuzumab</b><br><b>n=101 (%)</b> | <b>p value</b> |
|----------------------------|--------------------------------------------------------------------------------------------|-----------------------------------------------------------------------------------------|----------------|
| Objective response rate    | 186 (71.0)                                                                                 | 49 (61.3)                                                                               | 0.100          |
| Adjusted OR (95% CI)       | 0.62 (0.34 – 1.10)                                                                         |                                                                                         | 0.104          |
| Best objective response    |                                                                                            |                                                                                         |                |
| Complete response          | 64 (24.4)                                                                                  | 20 (25.0)                                                                               | 0.917          |
| Partial response           | 122 (46.6)                                                                                 | 29 (36.3)                                                                               | 0.104          |
| Stable disease             | 40 (15.3)                                                                                  | 18 (22.5)                                                                               | 0.131          |
| Progressive disease        | 36 (13.7)                                                                                  | 13 (16.3)                                                                               | 0.575          |
| Clinical benefit rate      | 205 (78.0)                                                                                 | 58 (72.5)                                                                               | 0.313          |
| Adjusted OR (95% CI)       | 0.78 (0.41 – 1.49)                                                                         |                                                                                         | 0.455          |
| Non evaluable for response | 52 (16.5)                                                                                  | 21 (20.8)                                                                               | 0.192          |

Abbreviations: OR, odds ratio; CI, confidence intervals.
